# Supplementary material for: Description of the China global Merged Surface Temperature version 2.0
Source: Copernicus journal article supplement (doi:10.5194/essd-2021-447), 2022-01-18

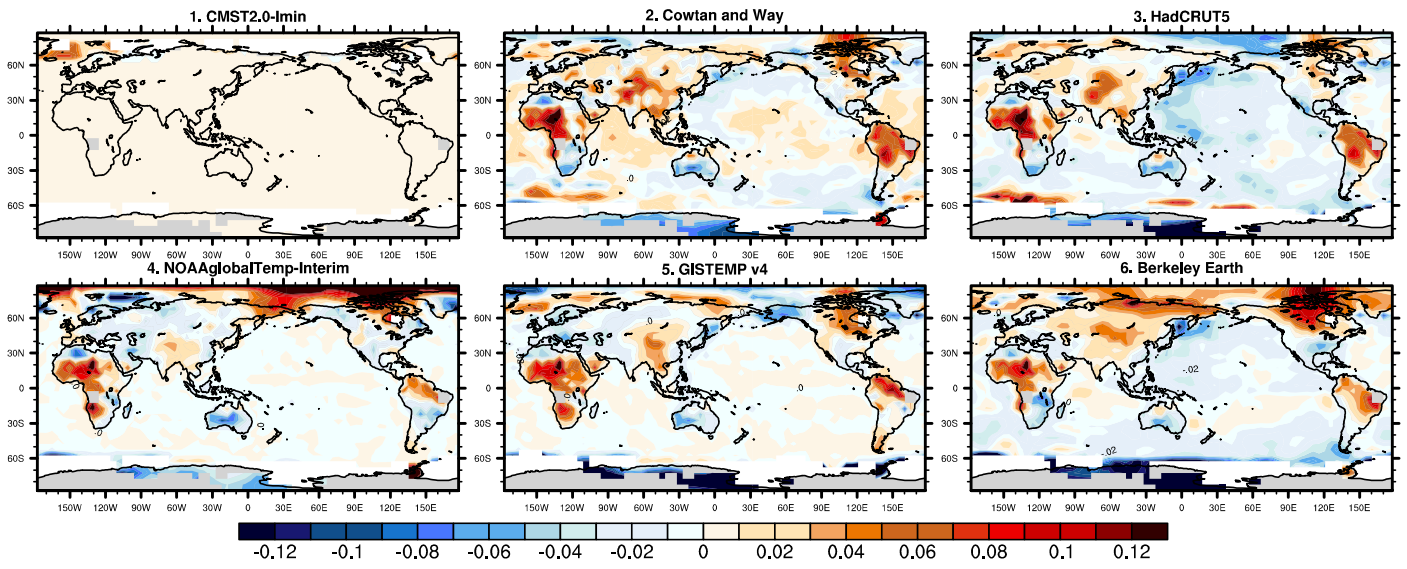

Supplement: Supplementary file [file essd-2021-447-AC2-supplement.pdf]
